# Supplementary material for: Microencapsulation of alcohol solvents and high-content actives for efficient transdermal delivery
Source: Royal Society of Chemistry journal article supplement (doi:10.1039/d3bm01411h), 2023-01-01
Supplement: d3bm01411h1.pdf [file d3bm01411h1.pdf]

## Electronic Supplementary Information

# Microencapsulation of Alcohol-Solvents and High-Content Actives for Efficient Transdermal Delivery

Je Hyun Lee <sup>†a</sup>, Yoon-Ho Hwang <sup>†a</sup>, Minjoo Noh <sup>b</sup>, Ji Hyun Lee <sup>b</sup>, Jun Bae Lee <sup>\*b</sup>, Hyomin Lee <sup>\*a</sup>

<sup>a</sup> Department of Chemical Engineering, Pohang University of Science and Technology (POSTECH), Pohang 37673, Republic of Korea and <sup>b</sup> Innovation Lab. Cosmax R&I Center, Seongnam 13486, Republic of Korea.

E-mail: <sup>a</sup>hyomin@postech.ac.kr and <sup>b</sup>jblee@cosmax.com

<sup>†</sup>These authors equally contributed to this work.

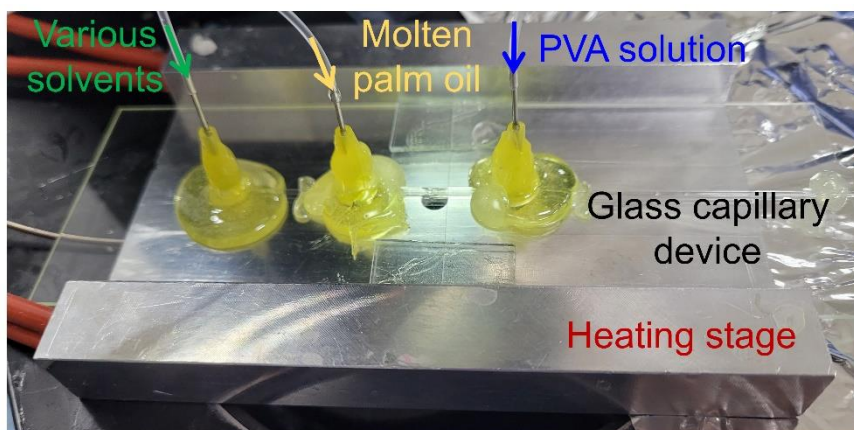

**Fig. S1** Photograph of the device and the detailed setup used for the production of palm oil-based microcapsules.

**Table S1.** Hansen solubility parameters (HSP) of palm oil, PEGDA, water, EtOH, and DPG.

|         |          | ${}^a\delta_d(\text{MPa}^{1/2})$ | ${}^a\delta_p(\text{MPa}^{1/2})^b$ | ${}^a\delta_h(\text{MPa}^{1/2})^c$ |
|---------|----------|----------------------------------|------------------------------------|------------------------------------|
| Solute  | Palm oil | 17.7                             | 3.5                                | 3.7                                |
|         | PEGDA    | 17.0                             | 10.7                               | 8.9                                |
| Solvent | Water    | 15.5                             | 16.0                               | 42.3                               |
|         | Ethanol  | 15.8                             | 8.8                                | 19.4                               |
|         | DPG      | 16.5                             | 10.6                               | 17.7                               |

<sup>a</sup>Values reported elsewhere.<sup>15-18</sup>  $\delta_d$ ,  $\delta_p$ , and  $\delta_h$  each indicates dispersion solubility parameter, polar solubility parameter, and hydrogen bonding solubility parameter, respectively.

**Table S2.** Relative energy difference (RED) results of palm oil and PEGDA acquired by calculating the ratio of HSP distance ( $R_a$ ) between the solute and various solvents to the interaction radius ( $R_o$ ) of the solute.

|          | Interaction radius ( $R_o$ ) <sup>a</sup> | HSP distance between solute-solvents ( $R_a$ ) |         |      | Relative energy difference (RED)/(Score) <sup>b</sup> |         |         |
|----------|-------------------------------------------|------------------------------------------------|---------|------|-------------------------------------------------------|---------|---------|
|          |                                           | Water                                          | Ethanol | DPG  | Water                                                 | Ethanol | DPG     |
| Palm oil | 4.7                                       | 40.8                                           | 17.0    | 15.9 | 8.7 (0)                                               | 3.6 (0) | 3.4 (0) |
| PEGDA    | 22                                        | 34.0                                           | 10.9    | 8.9  | 1.54 (0)                                              | 0.5 (1) | 0.4 (1) |

<sup>a</sup>Values reported elsewhere.<sup>15-18</sup> <sup>b</sup>Score 1: good solvent, and score 0: poor solvent.

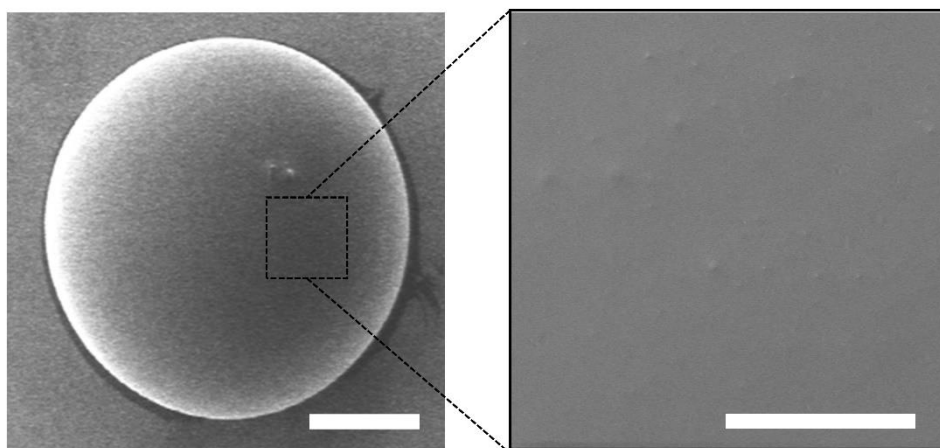

**Fig. S2** Low and high magnification scanning electron micrographs (SEM) of the palm oil-based microcapsule and its surface topology. Scale bars each represent 100 and 10  $\mu\text{m}$  for the left and right SEM, respectively.

**Table S3.** Composition of NC, WC, WC+D, and DC formulations containing niacinamide and adenosine. The niacinamide and adenosine amount in the microcapsule was determined using high-performance liquid chromatography (HPLC, Ultimate 3000, Dionex). All formulations contain equal amount of niacinamide and adenosine and the total amount of DPG in WC+D and DC formulations are identical. Additives are ethylenediaminetetraacetic acid (EDTA) and preservatives.

| Component                                            |                          | NC     | WC     | WC+D   | DC     |
|------------------------------------------------------|--------------------------|--------|--------|--------|--------|
| Microcapsule (core)                                  | Niacinamide              | -      | 0.2    | 0.2    | 0.2    |
|                                                      | Adenosine                | -      | 0.04   | 0.04   | 0.04   |
|                                                      | Dipropylene glycol (DPG) | -      | -      | -      | 0.38   |
|                                                      | Water                    | -      | 0.76   | 0.76   | 0.38   |
| Niacinamide                                          |                          | 2      | 1.8    | 1.8    | 1.8    |
| Adenosine                                            |                          | 0.04   | -      | -      | -      |
| DPG                                                  |                          | -      | -      | 5      | 4.62   |
| Butylene glycol (1,3-BG)                             |                          | 5      | 5      | 5      | 5      |
| Cetearyl Alcohol                                     |                          | 2      | 2      | 2      | 2      |
| Cetyl Alcohol                                        |                          | 1      | 1      | 1      | 1      |
| Cetyl Palmitate/Sorbitan Oliviate/Sorbitan Palmitate |                          | 1      | 1      | 1      | 1      |
| Caprylic/Capric Triglyceride                         |                          | 5      | 5      | 5      | 5      |
| Ceramide NP                                          |                          | 0.5    | 0.5    | 0.5    | 0.5    |
| Stearic acid                                         |                          | 0.5    | 0.5    | 0.5    | 0.5    |
| Oleic acid                                           |                          | 0.3    | 0.3    | 0.3    | 0.3    |
| Water                                                |                          | To 100 | To 100 | To 100 | To 100 |
| Additive                                             |                          | q.s    | q.s    | q.s    | q.s    |

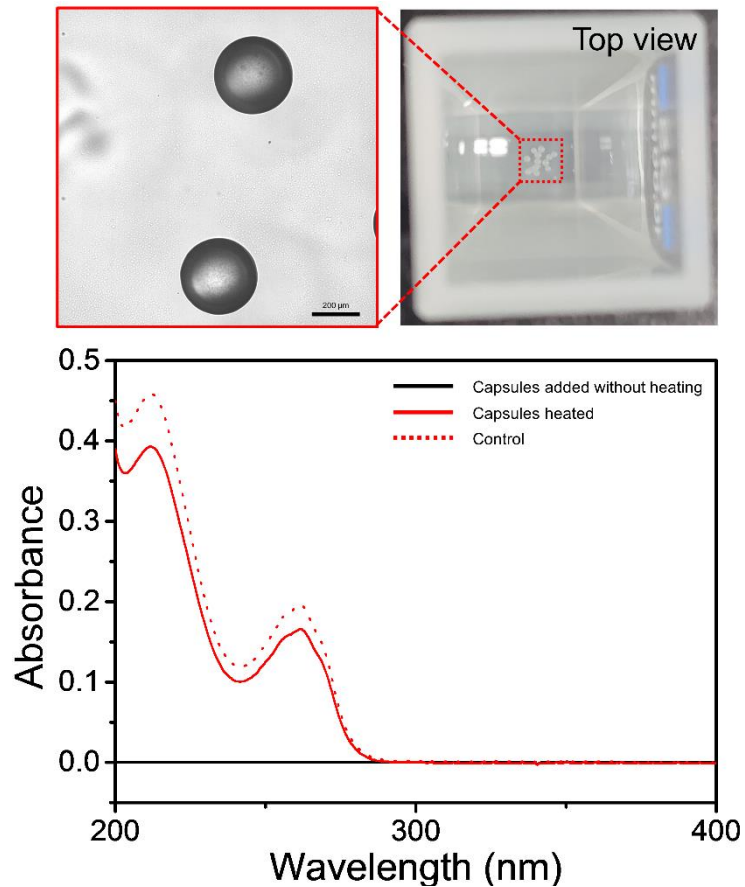

**Fig. S3** Top-view photograph of the microcapsule suspension in a quartz cuvette, micrograph and UV-Vis spectra of the microcapsule suspension containing niacinamide and adenosine before and after heating. Black spectrum shows negligible absorbance even after 1 months of storage which indicates minimal leakage of actives from the microcapsule without additional heating. The red solid spectrum shows two characteristics peaks at wavelength of 212 and 262 nm which increases after heating. This indicates the thermally triggered release of encapsulated niacinamide and adenosine from the microcapsules. The red dotted spectrum represents the control where all niacinamide and adenosine encapsulated in the water capsule is released into the aqueous continuous phase.

**Table S4.** Human primary skin irritation test using ICDRG guidelines. The degree of skin irritation is scored as follows: (-) = no reaction, 1 = slight erythema, either spotty or diffuse, 2 = moderate uniform erythema, 3 = intense erythema with edema; 4= intense erythema with edema and vesicles.

| Formulation type | Number of participants | Degree of skin irritation |             | Overall evaluation |
|------------------|------------------------|---------------------------|-------------|--------------------|
|                  |                        | After 30 min              | After 24 hr |                    |
| NC               | 32                     | -                         | -           | No irritation      |
| WC               | 32                     | -                         | -           | No irritation      |
| WC+D             | 31                     | -                         | -           | No irritation      |
| DC               | 31                     | -                         | -           | No irritation      |
